# Supplementary material for: A Boolean network inference from time-series gene expression data using a genetic algorithm
Source: Oxford University Press journal article supplement (doi:10.1093/bioinformatics/bty584), 2018-07-06
Supplement: bioinformatics_34_17_i927_s1.pdf [file bioinformatics_34_17_i927_s1.pdf]

# A Boolean Network Inference from Time-Series Gene Expression Data Using a Genetic Algorithm

Shohag Barman and Yung-Keun Kwon\*

School of IT Convergence, University of Ulsan, 93 Daehak-ro,  
Nam-gu, Ulsan, Republic of Korea

## Supplementary Information

```

function [V, A] = createRBN_BarabasiAlbert(N, e, d)
    //N : The desired number of nodes
    //e : The number of initial nodes
    //d : The number of interactions to be added at each step
    //V, A : A set of nodes V and a set of links A of the resulting network
    generated by the Barabasi-Albert model
    //randNumber(0, 1) : Returns a real number chosen from 0 to 1 uniformly
    at random
    V ← {0, 1, ..., e - 1};
    A ← ∅
    for i := 0 to e - 2 do
        for j := i + 1 to e - 1 do
            if (randNumber(0, 1) < 0.5) then
                A ← A ∪ {(i, j)};
            else
                A ← A ∪ {(j, i)};
            end if
        end for
    end for
    for i := e to N - 1 do
        for j := 0 to d - 1 do
            repeat
                v = selection(V); //v is chosen with a probability proportional
                to its degree.
                if (randNumber(0, 1) < 0.5) then
                    vSrc ← i, vDst ← v;
                else
                    vSrc ← v, vDst ← i;
                end if
                until ((vSrc, vDst) ∉ A);
                A ← A ∪ {(vSrc, vDst)};
            end for
            V ← V ∪ {i};
        end for
    return [V, A]
end function

```

**Fig. S1: Pseudo-code of the Barabasi-Albert model used in our simulation.** The desired number of nodes ( $N$ ), the number of nodes in the seed network ( $e$ ), and the number of edges to be added at each iteration ( $d$ ) are given as parameters. A small seed network  $G(V, A)$  consisting of  $V = \{v_1, v_2, \dots, v_e\}$  and  $A = \{(v_i, v_j) | i, j = 1, 2, \dots, e, \text{ and } i \neq j\}$  is randomly specified. At each iteration, a node  $v$  and  $d$  different interactions are newly inserted into the graph where the probability of connecting a new node and an existing node is proportional to the connectivity of the latter node. This process is repeated until  $|V| = N$  and a resultant network is returned as the output.

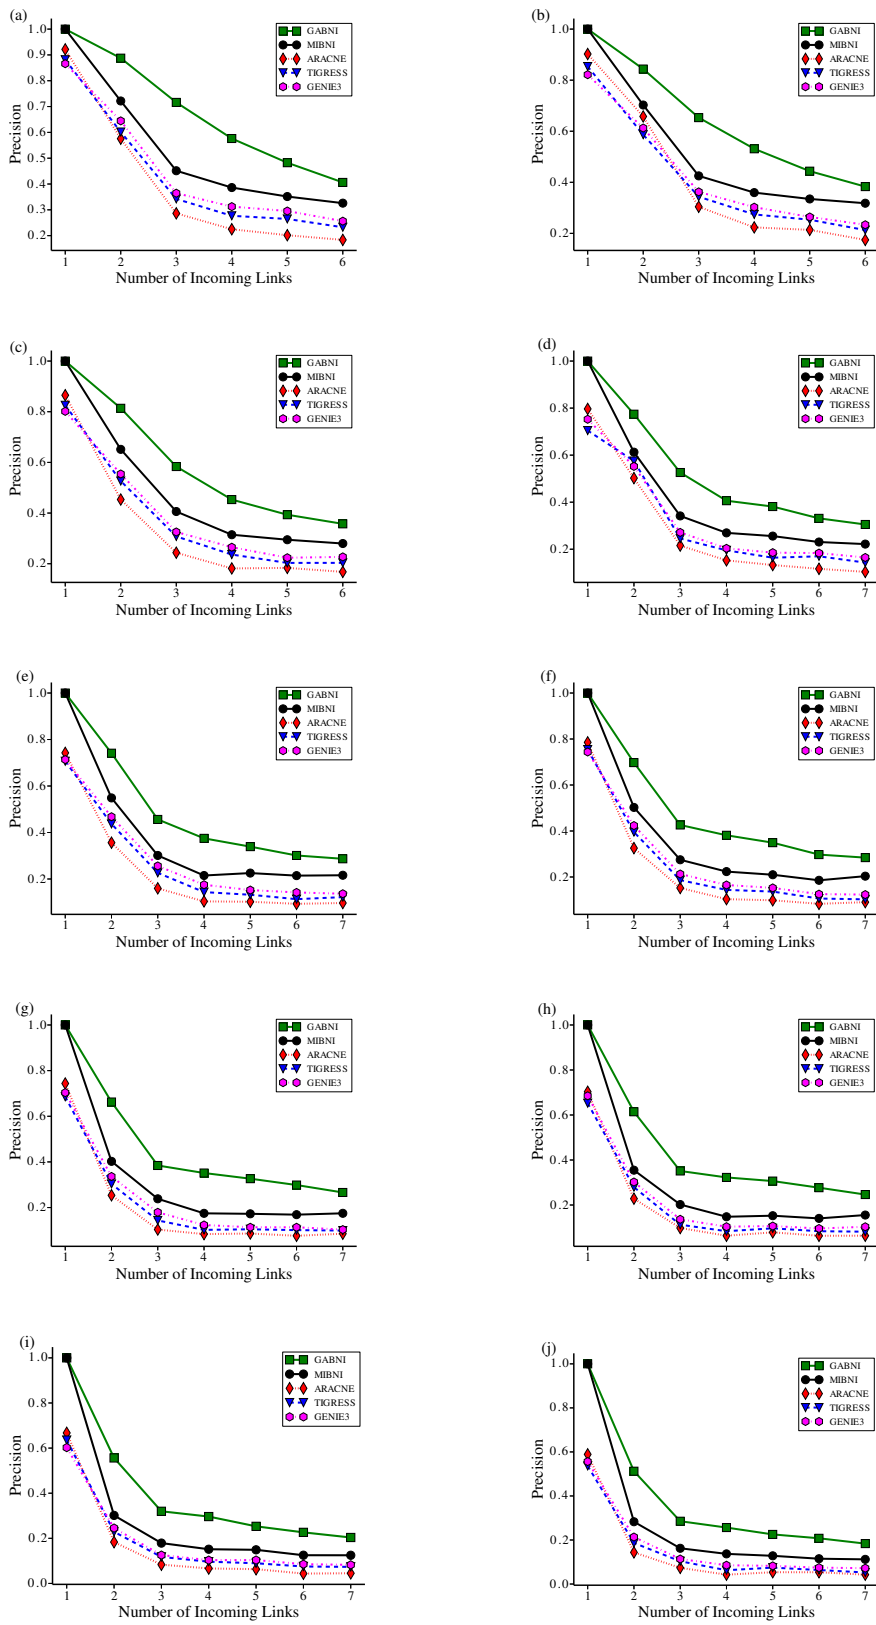

**Fig. S2: Comparison of precision between GABNI and other methods in GNW random networks.** (a)-(j) Precision results of networks with  $|V| = 10, 20, \dots, 100$ , respectively. In each subfigure, 30 GNW random networks were examined.

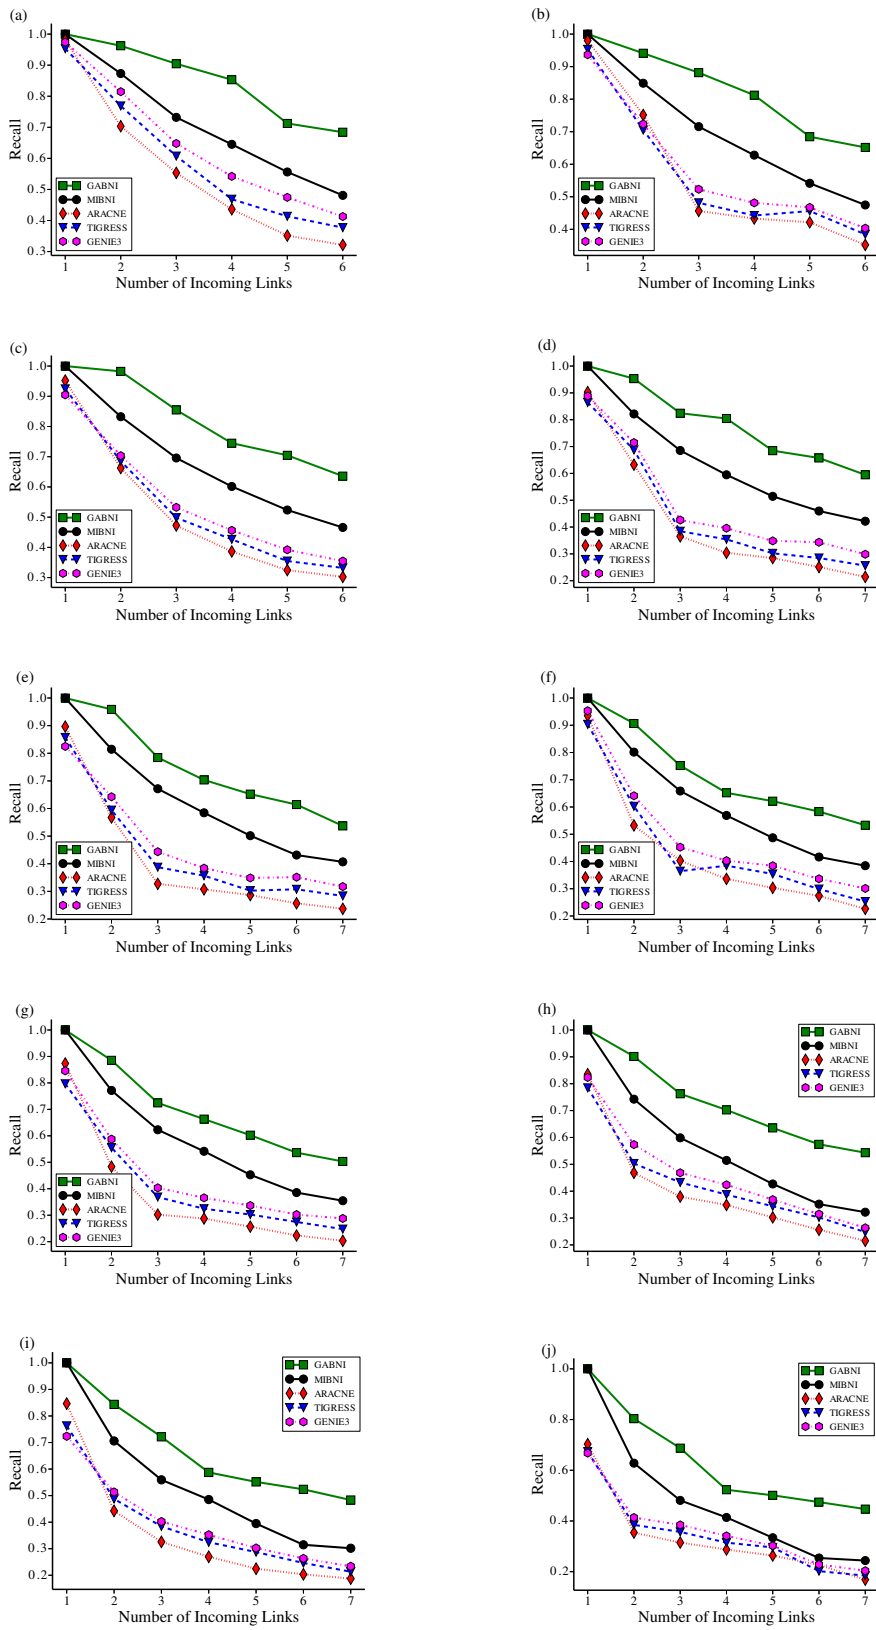

**Fig. S3: Comparison of recall between GABNI and other methods in GNW random networks.** (a)-(j) Recall results of networks with  $|V| = 10, 20, \dots, 100$ , respectively. In each subfigure, 30 GNW random networks were examined.

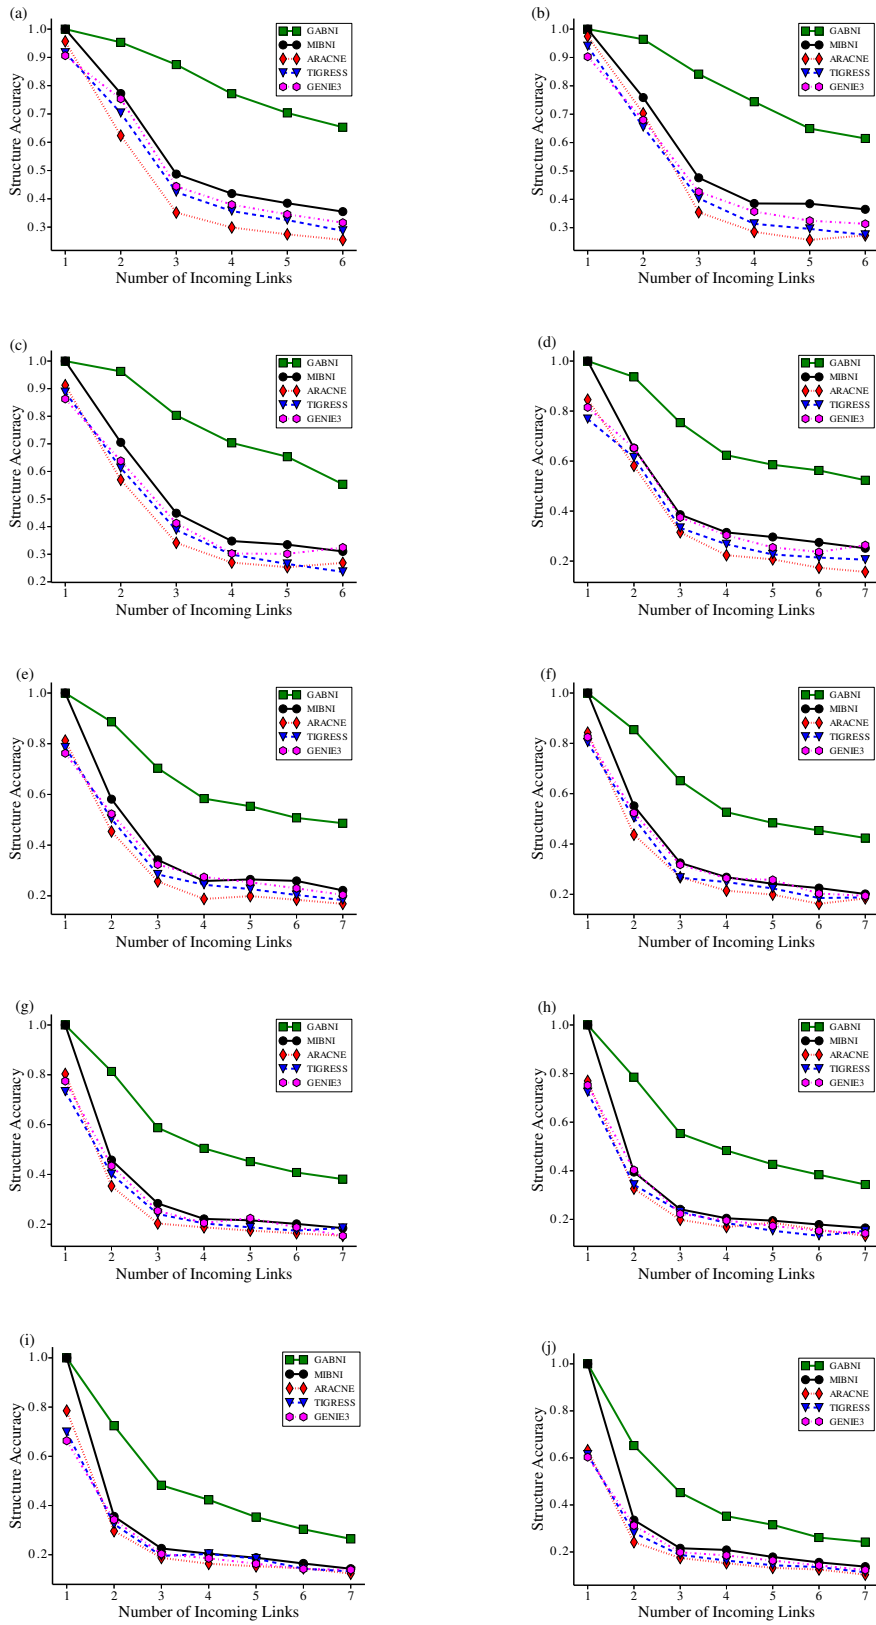

**Fig. S4: Comparison of structural accuracy between GABNI and other methods in GNW random networks. (a)-(j) Structural accuracy results of networks with  $|V| = 10, 20, \dots, 100$ , respectively. In each subfigure, 30 GNW random networks were examined.**

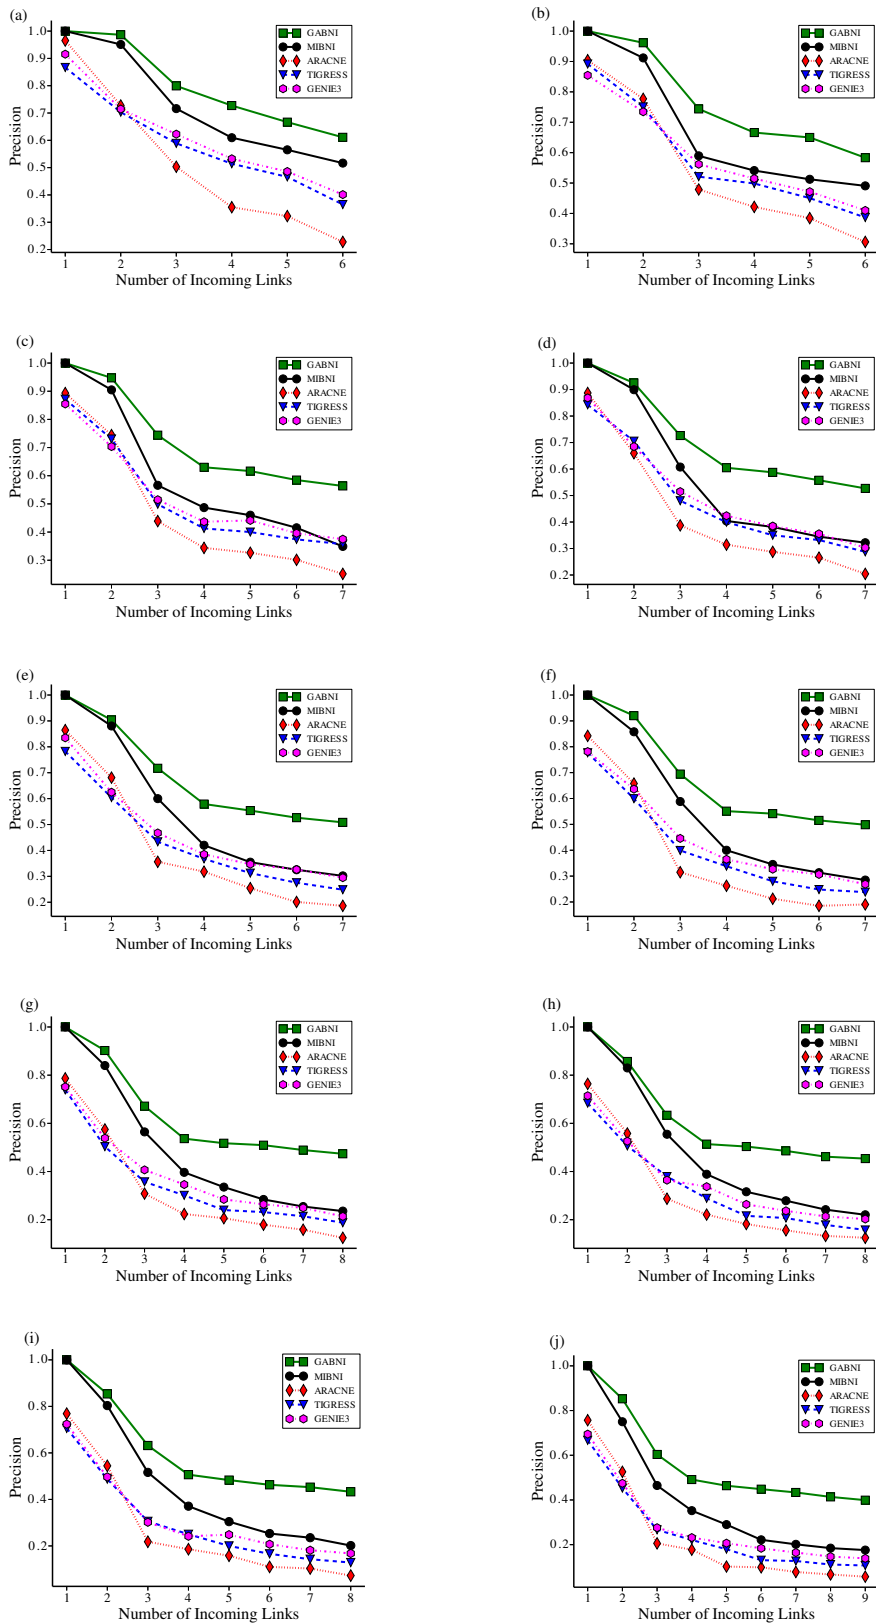

**Fig. S5: Comparison of precision between GABNI and other methods in BA random networks.** (a)-(j) Precision results of networks with  $|V| = 10, 20, \dots, 100$ , respectively. In each subfigure, 30 BA random networks were examined.

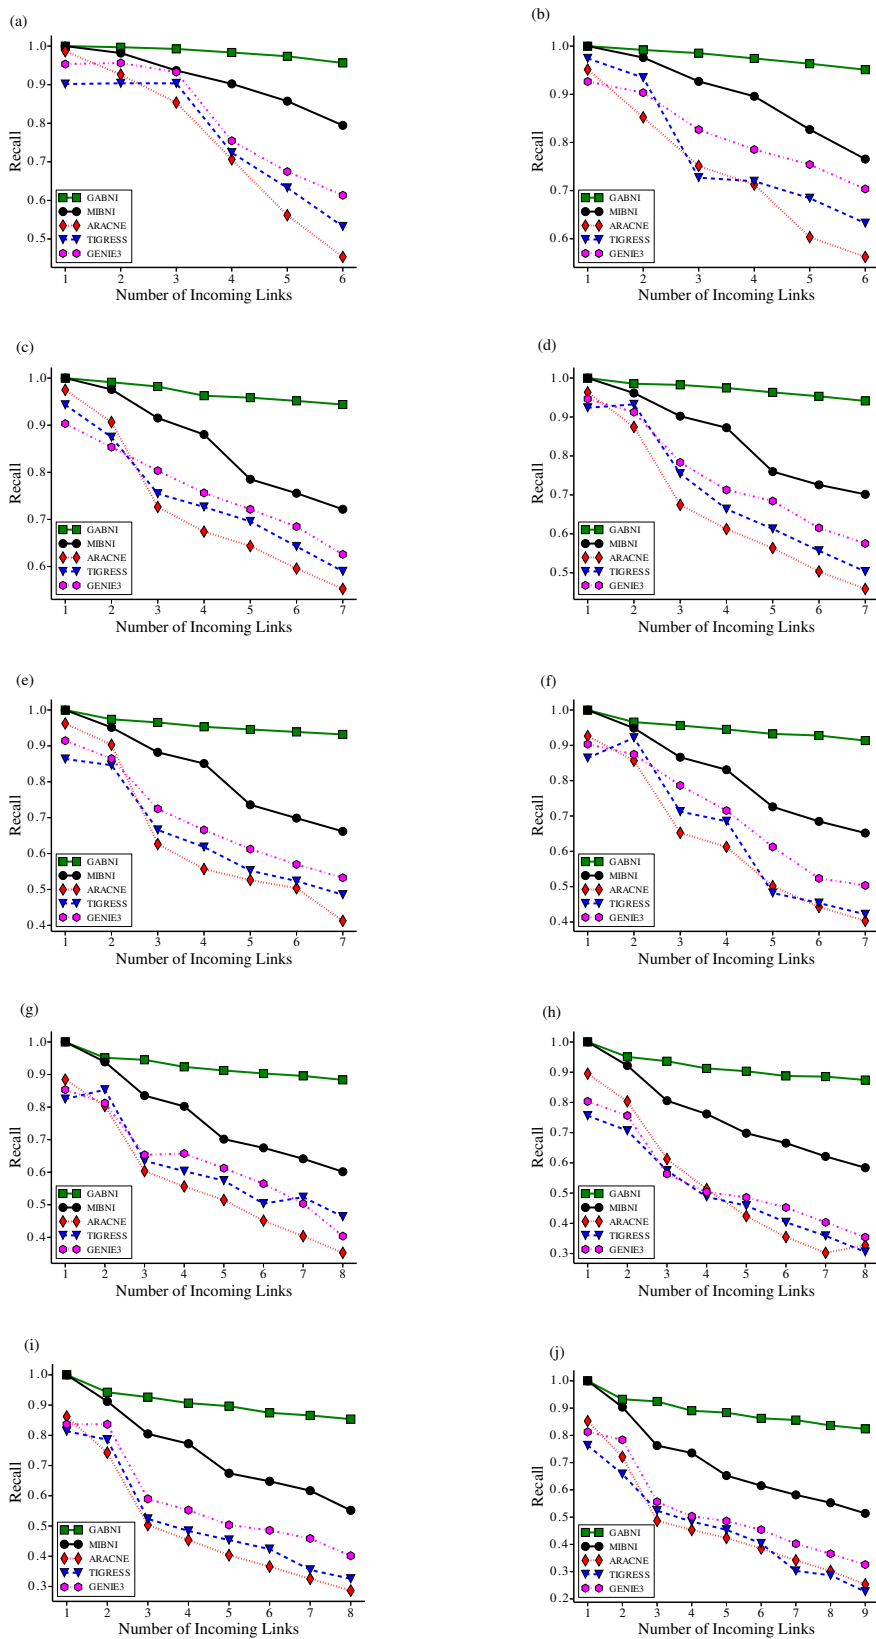

**Fig. S6: Comparison of recall between GABNI and other methods in BA random networks.** (a)-(j) Recall results of networks with  $|V| = 10, 20, \dots, 100$ , respectively. In each subfigure, 30 BA random networks were examined.

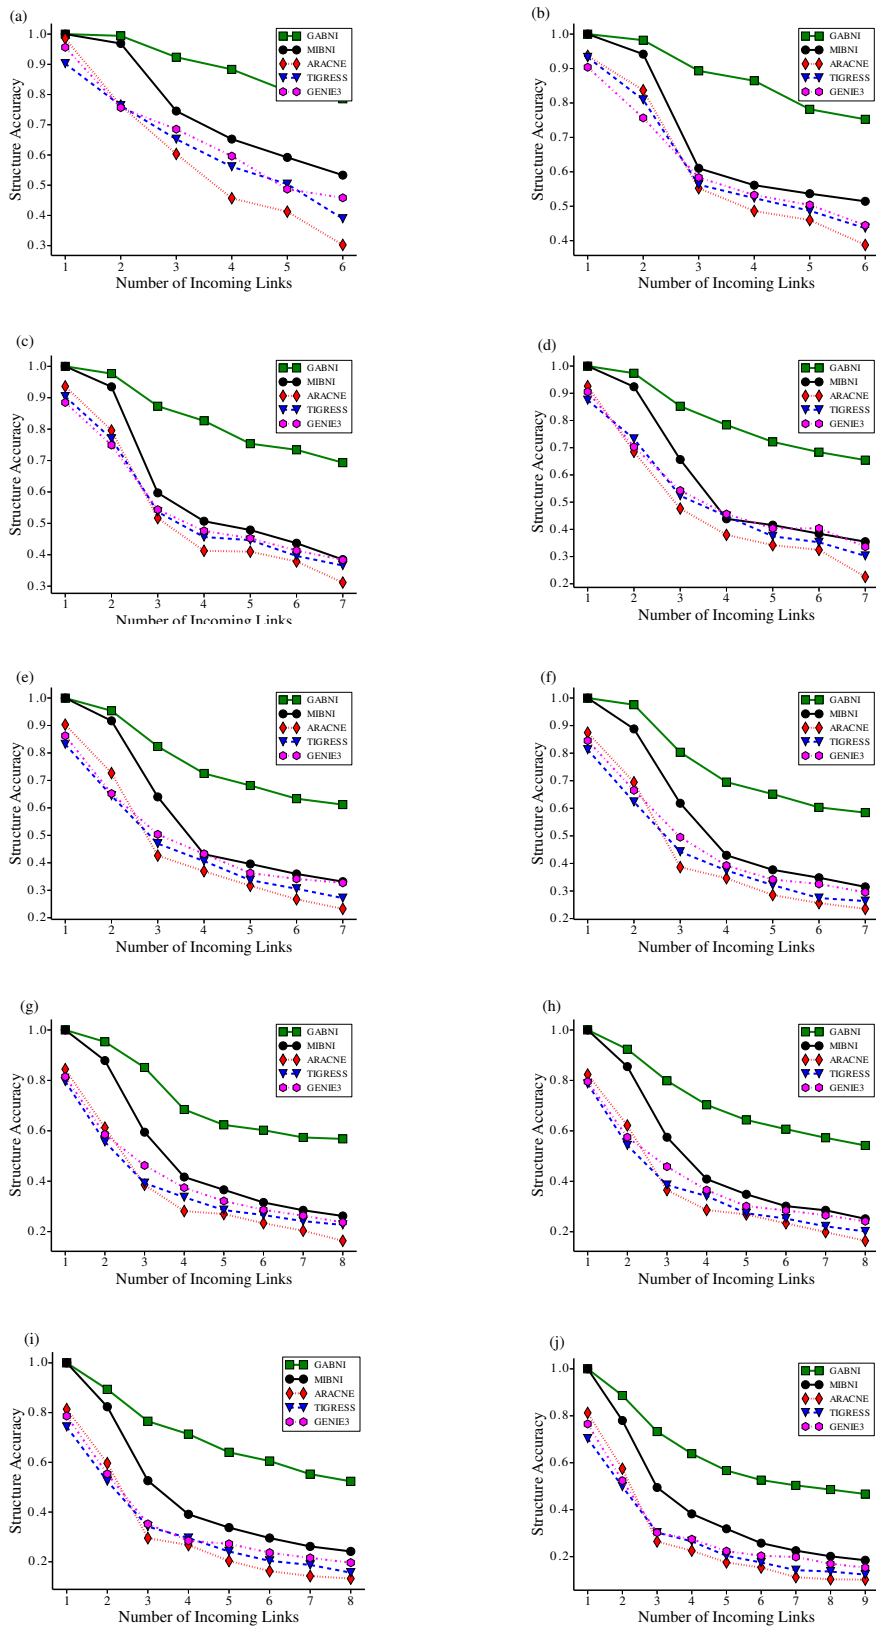

**Fig. S7: Comparison of structural accuracy between GABNI and other methods in BA random networks. (a)-(j) Structural accuracy results of networks with  $|V| = 10, 20, \dots, 100$ , respectively. In each subfigure, 30 BA random networks were examined.**



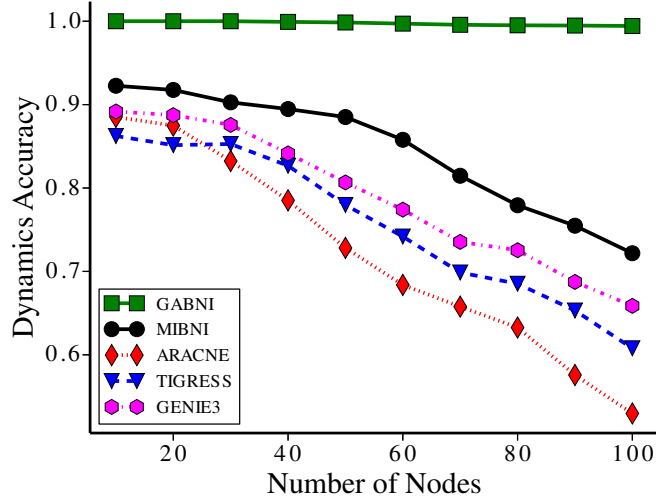

**Fig. S8: Comparison of dynamic accuracies between GABNI and other methods in GNW random networks.** A total of 300 GNW random networks with different network sizes ( $|V| = 10, 20, \dots, 100$ ) were used as target networks. For each point, 30 GNW random networks were examined. The dynamic accuracy of GABNI was 1.0 (perfect accuracy) for  $|V| \leq 30$  and 0.99 for the other sizes, whereas that of other methods sharply decreased as the network size increased.

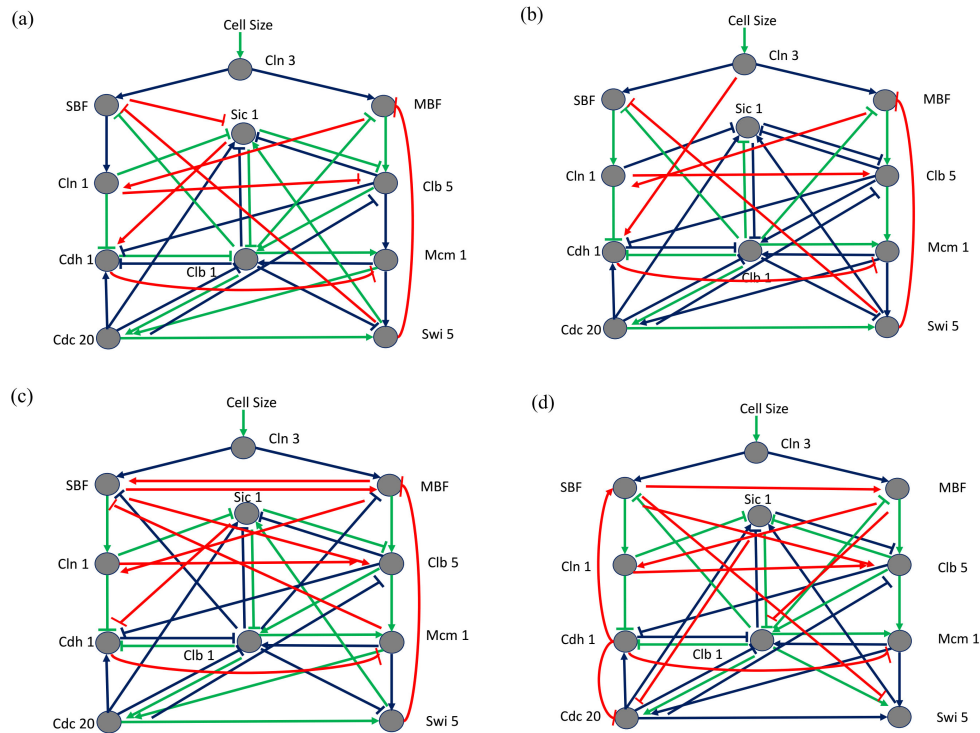

**Fig. S9: Inference performance of MIBNI, ARACNE, GENIE3, and TIGRESS with respect to budding yeast cell cycle network.** The green, red, and blue interactions denote true positive, false positive, and false negative predictions, respectively. (a) Inference results of MIBNI. The results showed 14 true positives, 7 false positives, and 15 false negatives. The structural and dynamics accuracies were 0.8240 and 0.9600, respectively. (b) Inference results of ARACNE. The results showed 11 true positives, 6 false positives, and 18 false negatives. The structural and dynamics accuracies were 0.8125 and 0.9600, respectively. (c) Inference results of GENIE3. The results showed 14 true positives, 9 false positives, and 15 false negatives. The structural and dynamics accuracies were 0.8080 and 0.9800, respectively. (d) Inference results of TIGRESS. The results showed 14 true positives, 9 false positives, and 15 false negatives. The structural and dynamics accuracies were 0.8080 and 0.9500, respectively.

**Table. S1:** The number of nodes and the range of the number of edges in GNW random networks.

| Number of nodes | Range of the number of edges |
|-----------------|------------------------------|
| 10              | 27-29                        |
| 20              | 40-58                        |
| 30              | 55-76                        |
| 40              | 75-86                        |
| 50              | 93-114                       |
| 60              | 100-137                      |
| 70              | 134-150                      |
| 80              | 151-169                      |
| 90              | 177-194                      |
| 100             | 188-204                      |

**Table. S2:** Boolean gene expression dataset of the budding yeast cell cycle.

| Time | Cln3 | MBF | SBF | Cln1 | Cdh1 | Swi5 | Cdc20 | Clb5 | Sic1 | Clb1 | Mcm1 | Phase |
|------|------|-----|-----|------|------|------|-------|------|------|------|------|-------|
| 1    | 1    | 0   | 0   | 0    | 1    | 0    | 0     | 0    | 1    | 0    | 0    | Start |
| 2    | 0    | 1   | 1   | 0    | 1    | 0    | 0     | 0    | 1    | 0    | 0    | G1    |
| 3    | 0    | 1   | 1   | 1    | 1    | 0    | 0     | 0    | 1    | 0    | 0    | G1    |
| 4    | 0    | 1   | 1   | 1    | 0    | 0    | 0     | 0    | 0    | 0    | 0    | G1    |
| 5    | 0    | 1   | 1   | 1    | 0    | 0    | 0     | 1    | 0    | 0    | 0    | S     |
| 6    | 0    | 1   | 1   | 1    | 0    | 0    | 0     | 1    | 0    | 1    | 1    | G2    |
| 7    | 0    | 0   | 0   | 1    | 0    | 0    | 1     | 1    | 0    | 1    | 1    | M     |
| 8    | 0    | 0   | 0   | 0    | 0    | 1    | 1     | 0    | 0    | 1    | 1    | M     |
| 9    | 0    | 0   | 0   | 0    | 0    | 1    | 1     | 0    | 1    | 1    | 1    | M     |
| 10   | 0    | 0   | 0   | 0    | 0    | 1    | 1     | 0    | 1    | 0    | 1    | M     |
| 11   | 0    | 0   | 0   | 0    | 1    | 1    | 1     | 0    | 1    | 0    | 0    | M     |
| 12   | 0    | 0   | 0   | 0    | 1    | 1    | 0     | 0    | 1    | 0    | 0    | M     |
| 13   | 0    | 0   | 0   | 0    | 1    | 0    | 0     | 0    | 1    | 0    | 0    | G1    |

**Table. S3:** The structural and dynamical accuracies in inferring the Budding yeast cell cycle network from a noisy gene expression.

| Inference methods | TP | FP | FN | Structural accuracy | Dynamical accuracy | Noise level |
|-------------------|----|----|----|---------------------|--------------------|-------------|
| GABNI             | 18 | 3  | 11 | 0.8843              | 1.0000             | 0% Noise    |
| MIBNI             | 14 | 7  | 15 | 0.8240              | 0.9600             |             |
| ARACNE            | 11 | 6  | 18 | 0.8125              | 0.9600             |             |
| GENIE3            | 14 | 9  | 15 | 0.8080              | 0.9800             |             |
| TIGRESS           | 14 | 9  | 15 | 0.8080              | 0.9500             |             |
| GABNI             | 15 | 11 | 14 | 0.8000              | 0.9800             | 5% Noise    |
| MIBNI             | 11 | 20 | 18 | 0.7076              | 0.8800             |             |
| ARACNE            | 8  | 20 | 21 | 0.6870              | 0.8700             |             |
| GENIE3            | 10 | 28 | 19 | 0.6356              | 0.9100             |             |
| TIGRESS           | 9  | 29 | 20 | 0.6230              | 0.8500             |             |
| GABNI             | 14 | 13 | 15 | 0.7741              | 0.9700             | 10% Noise   |
| MIBNI             | 9  | 23 | 20 | 0.6692              | 0.8600             |             |
| ARACNE            | 7  | 34 | 22 | 0.5757              | 0.8500             |             |
| GENIE3            | 9  | 31 | 20 | 0.6076              | 0.9000             |             |
| TIGRESS           | 8  | 32 | 21 | 0.5954              | 0.8600             |             |
